# Supplementary material
Source: PubMed Central journal article supplement (PMC9001011)

## Supplementary material

### Humoral response after a fourth “booster” dose of a Covid-19 vaccine following a 3-dose regimen of mRNA-based vaccination in dialysis patients

Pierre Housset, Sabah Kubab, Latifa Hanafi, Agathe Pardon, Nathalie Vittoz, Dogan-Firat Bozman, Valérie Caudwell, Anne-Laure Faucon

#### TABLE OF CONTENTS

|                                                                                                                                                      |   |
|------------------------------------------------------------------------------------------------------------------------------------------------------|---|
| Questionnaire on vaccine reactions and global tolerance after the fourth vaccine dose.....                                                           | 2 |
| Table S1. Characteristics of the study population .....                                                                                              | 3 |
| Table S2. Characteristics of the patients with breakthrough Covid-19 after the third or the fourth vaccine dose during the fifth wave pandemic. .... | 4 |
| Figure S1. Vaccination strategy in dialysis patients .....                                                                                           | 5 |
| Figure S2. Flowchart. ....                                                                                                                           | 6 |
| Figure S3. Kinetics of the anti-spike antibodies.....                                                                                                | 7 |
| Figure S4. Self-reported tolerance.....                                                                                                              | 8 |

**Questionnaire on vaccine reactions and global tolerance after the fourth vaccine dose.**

1. After the third vaccine injection, did you feel any of these side effects ?

- Pain at injection area
- Swelling at injection area
- Redness at injection area
- Headaches
- Diarrhea
- Fatigue
- Fever
- Chills
- Muscle pain

2. As compared to the third vaccine dose, would you say that side effects following the fourth injection were:

- Lower
- Similar
- Better

3. After the fourth vaccine dose, have you been hospitalized or did you visit Emergency Department for any reason? If yes, please indicate the reason.

**Table S1. Characteristics of the study population**

|                                                                                  | Overall<br>n = 45     |
|----------------------------------------------------------------------------------|-----------------------|
| <b>Medical history</b>                                                           |                       |
| Age, years                                                                       | 72 [56 ; 79]          |
| Men, n(%)                                                                        | 26 (57.8)             |
| Body mass index, kg/m <sup>2</sup>                                               | 27.3 [23.8 ; 31.3]    |
| Diabetes mellitus, n (%)                                                         | 18 (40.0)             |
| Hemopathy, n (%)                                                                 | 4 (8.9)               |
| Immunosuppression, n (%)                                                         | 5 (11.1)              |
| Hemodialysis, n (%)                                                              | 17 (37.8)             |
| Dialysis vintage, years                                                          | 3 [1 ; 6]             |
| Kt/v                                                                             | 1.64 [1.29, 1.94]     |
| <b>Biological data</b>                                                           |                       |
| Lymphocytes count, G/L                                                           | 1.17 [0.93 ; 1.64]    |
| Neutrophilic polynucleolar cells, G/L                                            | 4.10 [3.10 ; 5.26]    |
| Gamma globulin, g/L                                                              | 8.80 [7.20 ; 10.90]   |
| Serum albumin, g/L                                                               | 35.2 [33.4 ; 40.2]    |
| Serum prealbumin, g/L                                                            | 0.34 [0.30 ; 0.41]    |
| C reactive protein, mg/L                                                         | 1.9 [1.0 ; 3.8]       |
| <b>Humoral response to mRNA vaccine</b>                                          |                       |
| Anti-spike titer before the 3 <sup>rd</sup> dose, AU/mL                          | 284 [85 ; 856]        |
| Anti-spike titer 1 months after the 3 <sup>rd</sup> vaccine dose, AU/mL          | 956 [2268 ; 11801]    |
| Anti-spike titer 3 months after the 3 <sup>rd</sup> vaccine dose, AU/mL          | 2032 [647 ; 4093]     |
| Anti-spike titer 6 months after the 3 <sup>rd</sup> vaccine dose, AU/mL          | 923 [369 ; 2019]      |
| Time between the 3 <sup>rd</sup> and the 4 <sup>th</sup> vaccine dose, days      | 229 [214 ; 236]       |
| Time between M6 serology post 3 doses and the 4 <sup>th</sup> vaccine dose, days | 49 [42 ; 60]          |
| Time between the 4 <sup>th</sup> dose and serology, days                         | 15 [14 ; 22]          |
| Anti-spike titer after the 4 <sup>th</sup> vaccine dose, AU/mL                   | 21883 [10234 ; 42870] |
| Ratio anti-spike post 4 doses / anti-spike M6 post 3 doses                       | 18.9 [10.2 ; 46.7]    |

Results are shown as median [interquartile range] for continuous variables, or as number of patients and percentage for categorical variables. Ab: antibody; AU: arbitrary unit. Conversion factor : 1 AU/mL = 1.0288 BAU/mL.

**Table S2. Characteristics of the patients with breakthrough Covid-19 after the third or the fourth vaccine dose during the fifth wave pandemic.**

| Age | Sex | Dialysis modality | Number of doses | Last serology available | Clinical symptoms | Outcome     | Likely mode of contamination | Variant | Time between last dose and infection (days) |
|-----|-----|-------------------|-----------------|-------------------------|-------------------|-------------|------------------------------|---------|---------------------------------------------|
| 54  | W   | HD                | 3               | 1457                    | None              | Favorable   | HD Center***                 | -       | - **                                        |
| 32  | M   | HD                | 3               | 1810                    | None              | Favorable   | HD Center***                 | -       | - **                                        |
| 38  | M   | HD                | 3               | 1062                    | None              | Favorable   | HD Center***                 | Omicron | 253                                         |
| 51  | M   | HD                | 3               | 9638                    | Mild              | Favorable   | Unknown***                   | Omicron | 243                                         |
| 47  | M   | PD                | 4               | 57117                   | Mild              | Favorable   | Household                    | -       | 33                                          |
| 66  | M   | PD                | 3               | 53                      | Severe            | Death       | -                            | -       | 220                                         |
| 80  | W   | PD                | 3               | 0                       | Mild              | Favorable * | -                            | Omicron | 231                                         |
| 69  | M   | PD                | 3               | 5625                    | Mild              | Favorable   | -                            | -       | 202                                         |
| 83  | W   | PD                | 4               | 10234                   | None              | Favorable   | -                            | -       | 19                                          |

\*After monoclonal antibody (Sotrovimab) treatment

\*\*Diagnosis of asymptomatic infection was made on a seroconversion of anti-nucleocapsid

\*\*\* All four patients were dialyzed in a common room during the same dialysis session.

Because of PCR shortage or low viral load, some SARS-CoV-2 variants of concern remained unknown.

**Figure S1. Vaccination strategy in dialysis patients**

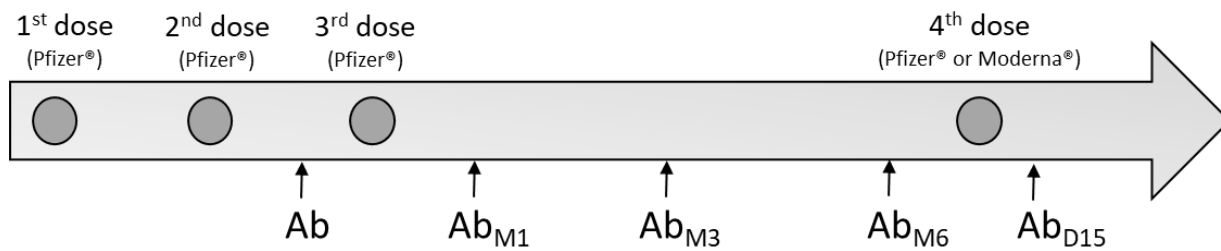

SARS-CoV-2 anti-spike antibody (Ab) titer was assessed before the third vaccine dose, at 1 (M1), 3 (M3), 6 (M6) months after the third dose, and 15 days (D15) after the fourth vaccine dose.

Figure S2. Flowchart.

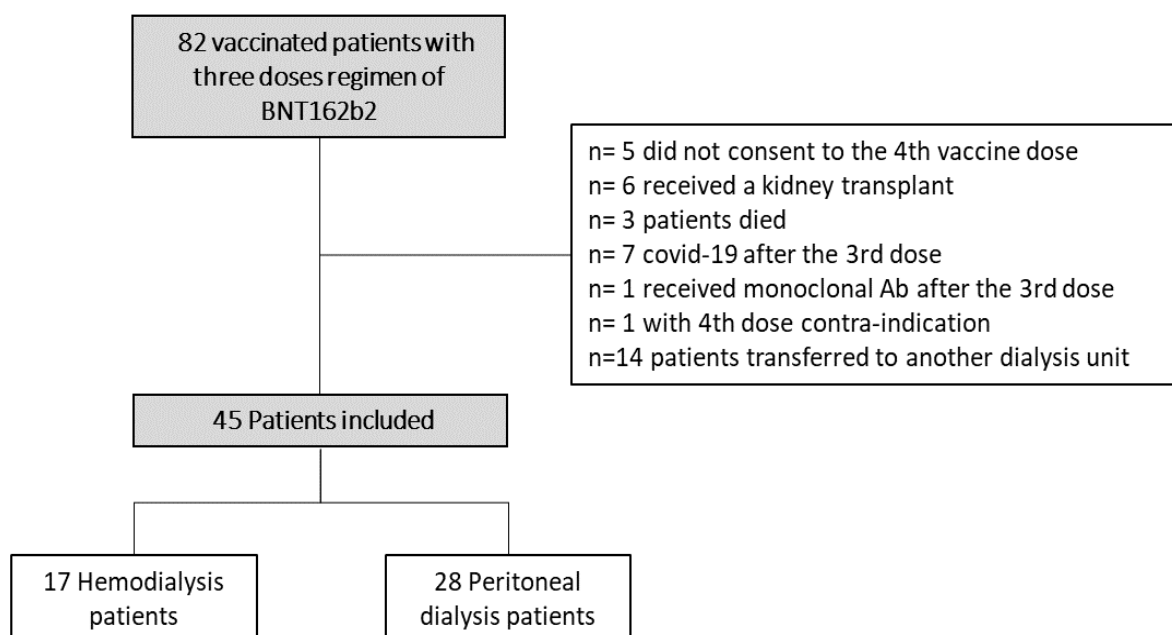

**Figure S3. Kinetics of the anti-spike antibodies.**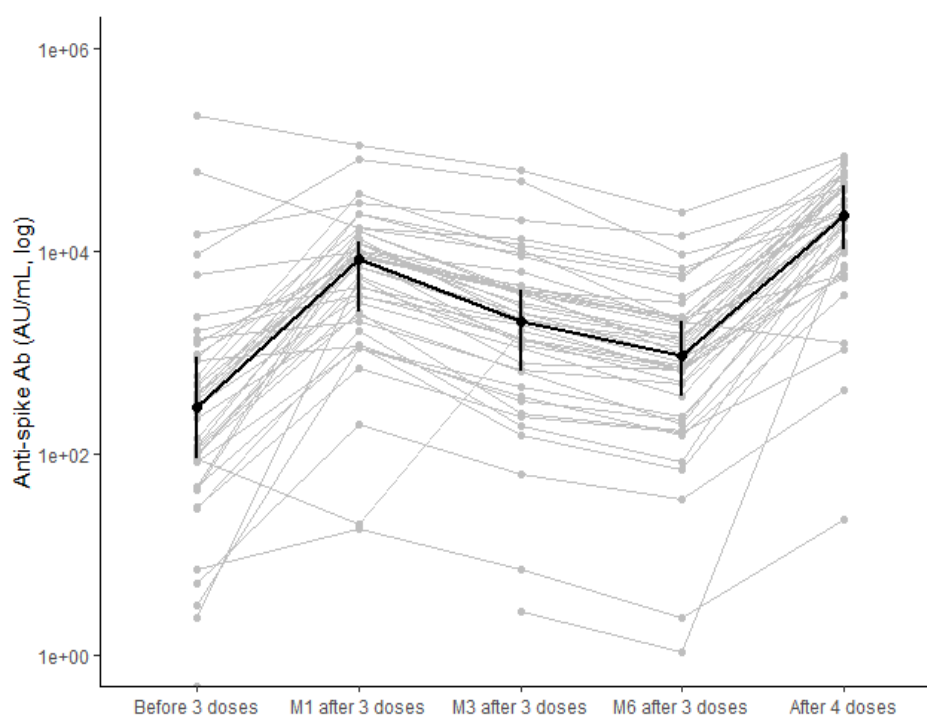

Figure shows the anti-spike antibody levels before, after the third dose of the mRNA BNT162b2 vaccine, and after the fourth vaccine dose (mRNA BNT162b2 Pfizer® or mRNA-1273 Moderna®) in dialysis patients. Grey points represent individual data, and black points represent median with interquartile range. Antibody titers lower than 1 cannot be plotted in the graphs, because of logarithm scale.

**Figure S4. Self-reported tolerance.**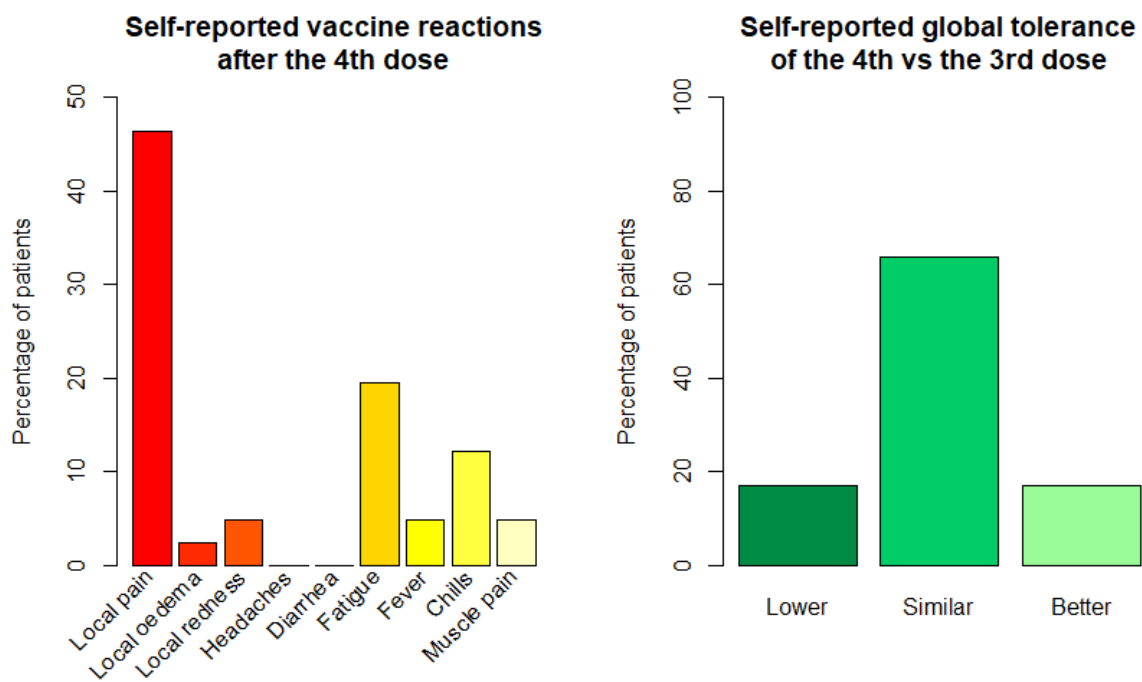

Supplement: mmc1.pdf [file mmc1.pdf]
